# Supplementary material
Source: PubMed Central journal article supplement (PMC4256872)
Supplement: supp_pp.114.251645_251645Supplemental_figures.pdf [file supp_pp.114.251645_251645Supplemental_figures.pdf]

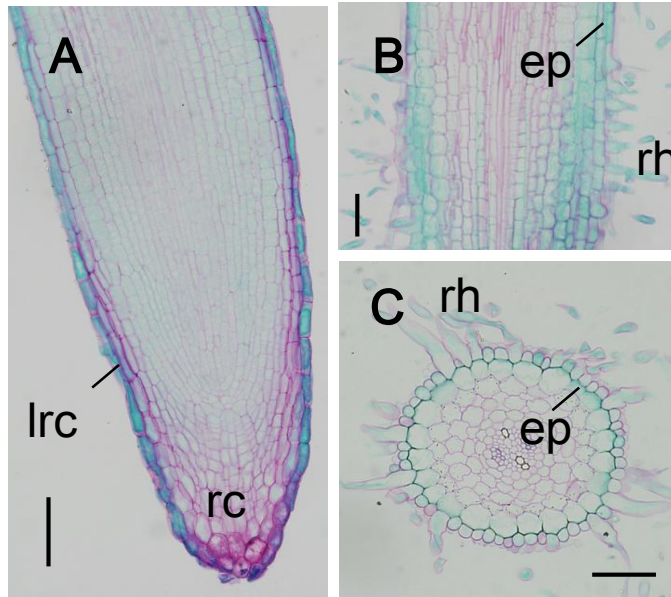

**Figure S1.** GUS staining of *ProNUP1::GUS* hairy roots. Thin sections of 10  $\mu\text{m}$ -thickness were counter-stained with Neutral Red. A, Longitudinal section of a root tip. B, Longitudinal section of a root differentiation zone. C, Cross-section of a root differentiation zone. rc; root cap, lrc; lateral root cap, ep; epidermis, and rh; root hair. Bars, 100  $\mu\text{m}$ .

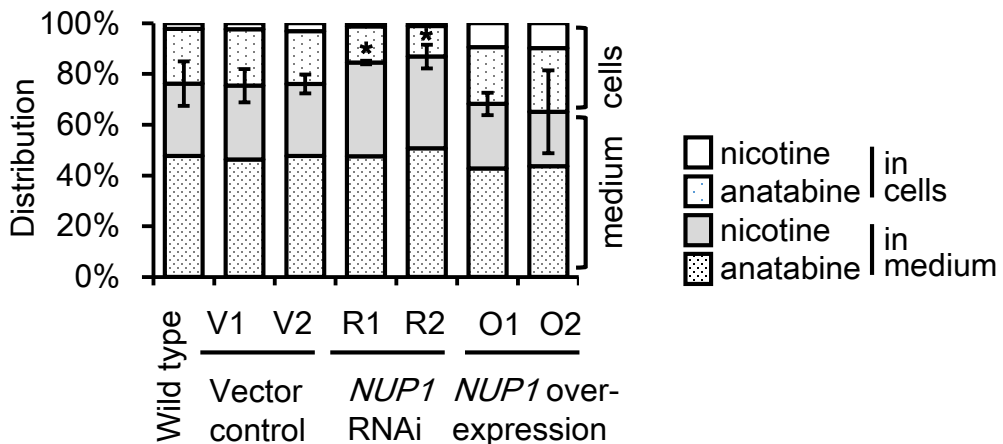

**Figure S2.** *NUP1* expression affects the distribution of tobacco alkaloids in cells and the culture medium. Tobacco alkaloids were measured in wild-type, vector control (V1 and V2), *NUP1* RNAi (R1 and R2), and *NUP1* overexpression (O1 and O2) lines of cultured tobacco BY-2 cells after they were treated with 100  $\mu$ M MeJA for 72 h. The data are the mean values ( $\pm$ SD) of three biological replicates. Significant differences between total alkaloids in cells and the culture medium were determined by Dunnett's test and are indicated by asterisks (\* for  $P < 0.05$ ).

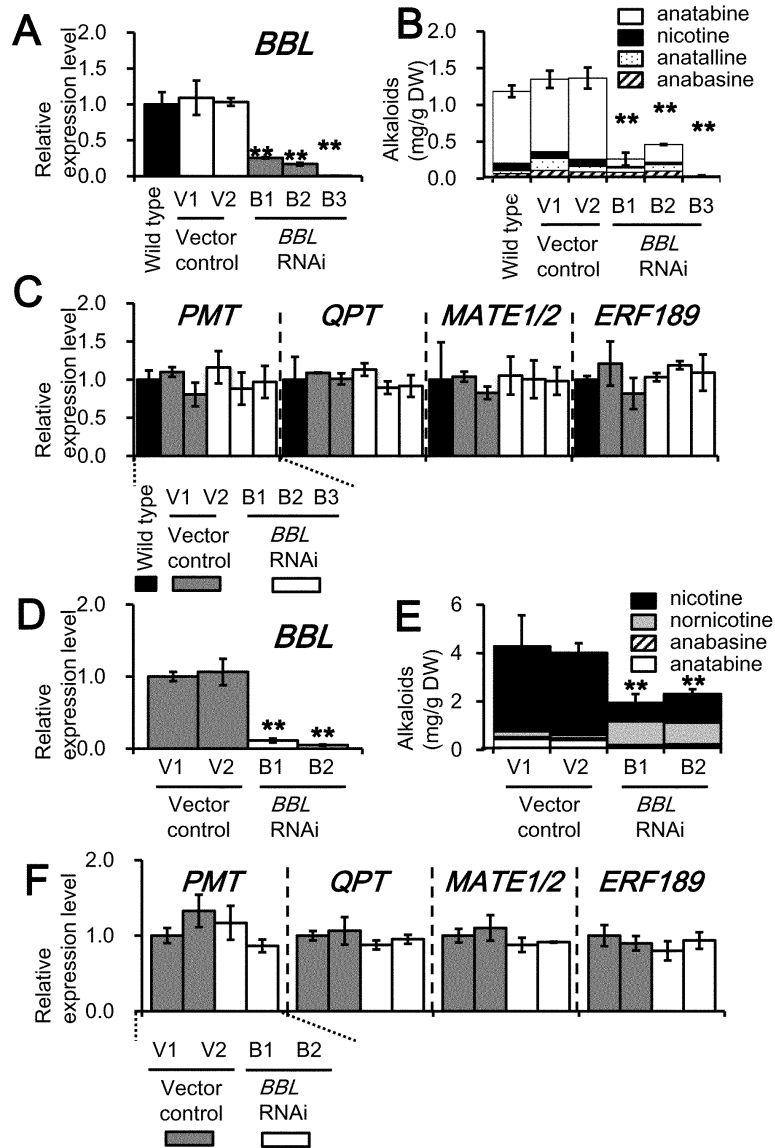

**Figure S3.** Down-regulation of *BBL* does not affect the expression of genes involved in alkaloid biosynthesis and transport. Data from cultured tobacco BY-2 cells are shown in A-C, whereas data from tobacco hairy roots are shown in D-F. Quantitative RT-PCR analysis of *BBL* (A and D), *PMT*, *QPT*, *MATE1/2*, and *ERF189* (C and F) expression, and the accumulation of tobacco alkaloids (B and E) in wild-type, vector control (V1 and V2), and *BBL* RNAi (B1, B2 and B3 in A-C, while B1 and B2 in D-F) transgenic lines. The cultured tobacco cells were treated with 100  $\mu$ M MeJA for 24 h for RNA extraction and for 72 h for alkaloid analysis. The data are the mean values ( $\pm$ SD) of three biological replicates. Significant differences between the wild type and test samples were determined by Dunnett's test and are indicated by asterisks (\* for  $P < 0.05$  and \*\* for  $P < 0.01$ ).
